# Supplementary material for: Care gaps among people presenting to the hospital following self-harm: observational study of three emergency departments in England
Source: HighWire-hosted journal article supplement (doi:10.1136/bmjopen-2024-085672), 2024-10-01
Supplement: bmjopen-2024-085672supp001_data_supplement.pdf [file bmjopen-2024-085672supp001_data_supplement.pdf]

**Table S1: Proportions of missing data among assessed self-harm episodes by study population characteristics and study outcomes**

|                                    | n (%)        | n (%) with mental health needs | n (%) referred to mental health services |
|------------------------------------|--------------|--------------------------------|------------------------------------------|
| Total (26909)                      |              |                                |                                          |
| Ethnic group missing               | 565 (2.1)    | 532 (94.2)                     | 198 (35.0)                               |
| Ethnic group not missing           | 26344 (97.9) | 25361 (96.3)                   | 9718 (36.9)                              |
| Employment status missing          | 1499 (5.6)   | 1400 (93.4)                    | 588 (39.2)                               |
| Employment status not missing      | 25410 (94.4) | 24493 (96.4)                   | 9328 (36.7)                              |
| Area level deprivation missing     | 1171 (4.4)   | 1127 (96.2)                    | 385 (32.9)                               |
| Area level deprivation not missing | 25738 (95.6) | 24766 (96.2)                   | 9531 (37.0)                              |
